# Supplementary material for: The role of associating liver partition and portal vein ligation for staged hepatectomy in unresectable hepatitis B virus-related hepatocellular carcinoma
Source: PubMed Central journal article supplement — Ann Transl Med. 2020 Nov;8(21):1402. doi: 10.21037/atm-20-2420 (PMC7723523; doi:10.21037/atm-20-2420), 2020-11
Supplement: atm-08-21-1402-supplementary.pdf [file atm-08-21-1402-supplementary.pdf]

Table S1 Operative data and complications

| Patient | Stage-1 operation    |                 |                     |                                 |                     | Stage-2 operation                    |                      |                 |                     |                                 |                     | Time interval between stage-1 and stage-2 operation (days) | Postoperative stay (days) | Overall hospital stay (days) |
|---------|----------------------|-----------------|---------------------|---------------------------------|---------------------|--------------------------------------|----------------------|-----------------|---------------------|---------------------------------|---------------------|------------------------------------------------------------|---------------------------|------------------------------|
|         | Operative time (min) | Blood loss (mL) | RBC transfusion (U) | Complications                   | Clavien-Dindo grade | Type of ALPPS                        | Operative time (min) | Blood loss (mL) | RBC transfusion (U) | Complications                   | Clavien-Dindo grade |                                                            |                           |                              |
| 1       | 270                  | 100             | 0                   | Hepatic and renal insufficiency | I                   | Right trisectionectomy ALPPS         | 310                  | 2,500           | 2                   | No complications                | No complications    | 9                                                          | 14                        | 30                           |
| 2       | 280                  | 1,000           | 2                   | No complications                | No complications    | Right trisectionectomy ALPPS         | 110                  | 50              | 0                   | No complications                | No complications    | 7                                                          | 10                        | 36                           |
| 3       | 240                  | 200             | 0                   | No complications                | No complications    | Right hemihepatectomy ALPPS          | 240                  | 100             | 0                   | No complications                | No complications    | 9                                                          | 8                         | 27                           |
| 4       | 180                  | 200             | 0                   | Pleural effusion                | I                   | Right hemihepatectomy ALPPS          | 150                  | 3,000           | 3                   | Hepatic insufficiency           | II                  | 10                                                         | 17                        | 49                           |
| 5       | 210                  | 300             | 0                   | No complications                | No complications    | Right hemihepatectomy ALPPS          | 100                  | 100             | 0                   | No complications                | No complications    | 16                                                         | 14                        | 33                           |
| 6       | 210                  | 300             | 0                   | No complications                | No complications    | Right hemihepatectomy ALPPS          | 130                  | 300             | 0                   | No complications                | No complications    | 13                                                         | 9                         | 27                           |
| 7       | 180                  | 100             | 0                   | No complications                | No complications    | Right hemihepatectomy ALPPS          | 80                   | 50              | 0                   | No complications                | No complications    | 7                                                          | 11                        | 24                           |
| 8       | 230                  | 150             | 0                   | No complications                | No complications    | Right hemihepatectomy ALPPS          | 125                  | 100             | 0                   | No complications                | No complications    | 7                                                          | 8                         | 22                           |
| 9       | 240                  | 200             | 0                   | No complications                | No complications    | Right hemihepatectomy ALPPS          | 290                  | 600             | 2                   | No complications                | No complications    | 12                                                         | 20                        | 41                           |
| 10      | 190                  | 600             | 0                   | Peritoneal abscess              | II                  | Right trisectionectomy ALPPS         | 150                  | 500             | 0                   | No complications                | No complications    | 12                                                         | 29                        | 47                           |
| 11      | 295                  | 800             | 1                   | No complications                | No complications    | Right hemihepatectomy ALPPS          | 205                  | 800             | 3                   | No complications                | No complications    | 7                                                          | 15                        | 31                           |
| 12      | 280                  | 2,000           | 4                   | No complications                | No complications    | Right hemihepatectomy ALPPS          | 280                  | 1,000           | 0                   | No complications                | No complications    | 14                                                         | 10                        | 29                           |
| 13      | 330                  | 600             | 0                   | No complications                | No complications    | Right trisectionectomy ALPPS         | 577                  | 600             | 4                   | No complications                | No complications    | 13                                                         | 9                         | 25                           |
| 14      | 327                  | Missing data    | 0                   | No complications                | No complications    | –                                    | –                    | –               | –                   | –                               | –                   | –                                                          | –                         | 26                           |
| 15      | Missing data         | Missing data    | 0                   | No complications                | No complications    | Right trisectionectomy ALPPS         | 134                  | 100             | 0                   | Hepatic insufficiency           | II                  | 11                                                         | 28                        | 58                           |
| 16      | 360                  | 200             | 0                   | No complications                | No complications    | Right hemihepatectomy ALPPS          | 235                  | Missing data    | 0                   | No complications                | No complications    | 14                                                         | 16                        | 37                           |
| 17      | 415                  | 800             | 0                   | No complications                | No complications    | Extended right hemihepatectomy ALPPS | 145                  | 100             | 0                   | No complications                | No complications    | 14                                                         | 14                        | 39                           |
| 18      | 270                  | 300             | 0                   | No complications                | No complications    | –                                    | –                    | –               | –                   | –                               | –                   | –                                                          | –                         | 62                           |
| 19      | 635                  | 100             | 0                   | No complications                | No complications    | Right trisectionectomy ALPPS         | 210                  | 200             | 0                   | Thoracic and abdominal effusion | III                 | 12                                                         | 10                        | 31                           |
| 20      | 333                  | Missing data    | 0                   | No complications                | No complications    | Right hemihepatectomy ALPPS          | Missing data         | 1,500           | 3                   | No complications                | No complications    | 15                                                         | 34                        | 62                           |
| 21      | 271                  | 50              | 0                   | No complications                | No complications    | Right trisectionectomy ALPPS         | 225                  | 1,500           | 1.75                | No complications                | No complications    | 14                                                         | 12                        | 39                           |
| 22      | 210                  | 30              | 0                   | No complications                | No complications    | –                                    | –                    | –               | –                   | –                               | –                   | –                                                          | –                         | 55                           |
| 23      | 280                  | 100             | 0                   | No complications                | No complications    | Extended right hemihepatectomy ALPPS | 230                  | 300             | 0                   | No complications                | No complications    | 17                                                         | 9                         | 30                           |

RBC, red blood cell; ALPPS, associating liver partition and portal vein ligation for staged hepatectomy.

**Table S2** Liver volume pre- and post-stage 1 operations and FLR volume increase

| Patient | Time interval (days) | SLV (mL) | Pre-stage-1 operation |         | Post-stage-1 operation |         | FLR volume increase      |                         | KGR                   |              |
|---------|----------------------|----------|-----------------------|---------|------------------------|---------|--------------------------|-------------------------|-----------------------|--------------|
|         |                      |          | FLR volume (mL)       | FLR/SLV | FLR volume (mL)        | FLR/SLV | FLR volume increase (mL) | FLR volume increase (%) | Absolute KGR (mL/day) | RKGR (%/day) |
| 1       | 6                    | 1,170    | 330                   | 0.28    | 560                    | 0.48    | 230                      | 69.70                   | 38.33                 | 11.62        |
| 2       | 7                    | 1,060    | 310                   | 0.29    | 480                    | 0.45    | 170                      | 54.80                   | 24.29                 | 7.83         |
| 3       | 7                    | 1,140    | 400                   | 0.35    | 600                    | 0.53    | 200                      | 50.00                   | 28.57                 | 7.14         |
| 4       | 7                    | 1,142    | 316                   | 0.28    | 520                    | 0.46    | 204                      | 64.60                   | 29.14                 | 9.23         |
| 5       | 13                   | 1,241    | 400                   | 0.32    | 493                    | 0.40    | 93                       | 23.30                   | 7.15                  | 1.79         |
| 6       | 9                    | 1,240    | 287                   | 0.23    | 463                    | 0.37    | 176                      | 61.30                   | 19.56                 | 6.81         |
| 7       | 7                    | 1,142    | 254                   | 0.22    | 495                    | 0.43    | 241                      | 94.90                   | 34.43                 | 13.56        |
| 8       | 7                    | 1,312    | 380                   | 0.29    | 706                    | 0.54    | 326                      | 85.80                   | 46.57                 | 12.26        |
| 9       | 9                    | 1,272    | 329                   | 0.26    | 575                    | 0.45    | 246                      | 74.80                   | 27.33                 | 8.31         |
| 10      | 8                    | 1,238    | 272                   | 0.22    | 383                    | 0.31    | 111                      | 40.81                   | 13.88                 | 5.10         |
| 11      | 7                    | 1,276    | 358                   | 0.28    | 570                    | 0.45    | 212                      | 59.20                   | 30.29                 | 8.46         |
| 12      | 8                    | 1,324    | 314                   | 0.24    | 555                    | 0.42    | 241                      | 76.80                   | 30.13                 | 9.60         |
| 13      | 13                   | 1,328    | 424                   | 0.32    | 685                    | 0.52    | 261                      | 61.56                   | 20.08                 | 4.74         |
| 14      | 16                   | 1,201    | 257                   | 0.21    | 302                    | 0.25    | 45                       | 17.70                   | 2.83                  | 1.11         |
| 15      | 7                    | 1,200    | 350                   | 0.29    | 459                    | 0.38    | 109                      | 31.10                   | 15.57                 | 4.44         |
| 16      | 7                    | 1,335    | 366                   | 0.27    | 544                    | 0.41    | 178                      | 48.60                   | 25.43                 | 6.94         |
| 17      | 10                   | 1,241    | 290                   | 0.23    | 336                    | 0.27    | 46                       | 15.90                   | 4.60                  | 1.59         |
| 18      | 25                   | 1,323    | 207                   | 0.16    | 305                    | 0.23    | 98                       | 47.30                   | 3.92                  | 1.89         |
| 19      | 7                    | 1,313    | 510                   | 0.39    | 687                    | 0.52    | 177                      | 34.80                   | 25.29                 | 4.97         |
| 20      | 10                   | 1,272    | 348                   | 0.27    | 483                    | 0.38    | 135                      | 38.80                   | 13.50                 | 3.88         |
| 21      | 9                    | 1,216    | 418                   | 0.34    | 488                    | 0.40    | 70                       | 16.75                   | 7.78                  | 1.86         |
| 22      | 19                   | 1,270    | 226                   | 0.18    | 383                    | 0.30    | 157                      | 69.50                   | 8.26                  | 3.66         |
| 23      | 12                   | 1,348    | 379                   | 0.28    | 452                    | 0.34    | 73                       | 19.26                   | 6.08                  | 1.61         |

FLR, future liver remnant; SLV, standard liver volume; KGR, kinetic growth rate; RKGR, relative KGR.

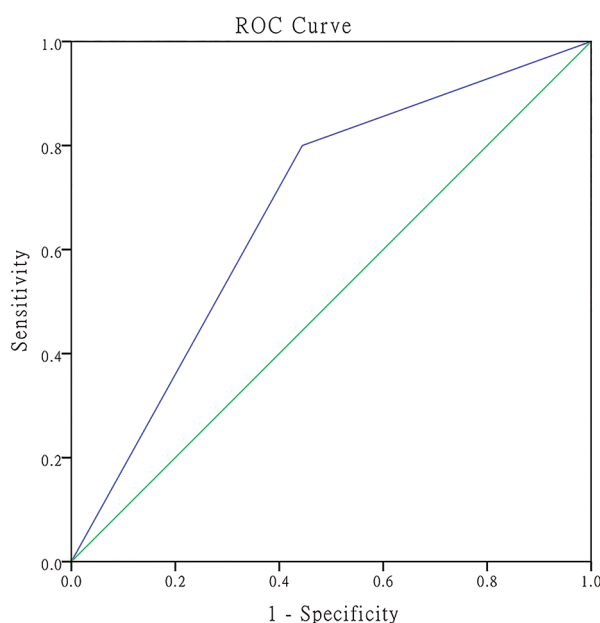

**Figure S1** ROC curve analysis for determination of the cut-off value for RKGR in patients with HBV-related HCC. ROC, receiver operating characteristic; RKGR, relative kinetic growth rate; HBV, hepatitis B virus; HCC, hepatocellular carcinoma.

**Table S3** Comparisons of baseline characteristics of HBV-related HCC patients receiving ALPPS and TACE before and after PSM

| Characteristics            | Before PSM (original cohort) |                         |         | After PSM (matched cohort) |                   |         |
|----------------------------|------------------------------|-------------------------|---------|----------------------------|-------------------|---------|
|                            | ALPPS (n=18)                 | TACE (n=76)             | P value | ALPPS (n=14)               | TACE (n=14)       | P value |
| Age (y)                    | 38.5 [32–59]                 | 50 [19–74]              | 0.004   | 38.5 [32–59]               | 41 [26–71]        | 0.782   |
| PVTT                       |                              |                         |         |                            |                   |         |
| Yes                        | 5                            | 55                      | 0.000   | 5                          | 5                 | 1       |
| No                         | 13                           | 21                      |         | 9                          | 9                 |         |
| Tumor number               |                              |                         |         |                            |                   |         |
| 1                          | 10                           | 20                      | 0.017   | 7                          | 7                 | 1       |
| >1                         | 8                            | 56                      |         | 7                          | 7                 |         |
| Largest tumor (cm)         | 9.6 (2.3–20.0)               | 8.4 (5.5–16.8)          | 0.554   | 8.8 (2.3–16.6)             | 8.15 (5.5–16.8)   | 0.872   |
| Ascites                    |                              |                         |         |                            |                   |         |
| Yes                        | 3                            | 14                      | 1       | 3                          | 2                 | 1       |
| No                         | 15                           | 62                      |         | 11                         | 12                |         |
| TBIL ( $\mu\text{mol/L}$ ) | 12.6 (7.0–25.7)              | 14.85 (4.1–42.3)        | 0.265   | 15.1 (8.0–23.6)            | 13.45 (4.1–42.3)  | 0.765   |
| AFP ( $\mu\text{g/L}$ )    | 1,933.5 (10.8–139,031.3)     | 675.5 (5.0–1,277,746.0) | 0.190   | 2,306.0 (45.2–139,031.3)   | 659 (5–118,900)   | 0.060   |
| ALT (U/L)                  | 37.0 (9.0–63.0)              | 28.5 (9.0–157.0)        | 0.453   | 38.5 (32.0–59.0)           | 31.5 (19.0–157.0) | 0.679   |
| AST (U/L)                  | 33.5 (17.0–320.0)            | 25.0 (4.0–218.0)        | 0.016   | 37.0 (17.0–320.0)          | 34.5 (10.0–218.0) | 0.408   |

HBV, hepatitis B virus; HCC, hepatocellular carcinoma; ALPPS, associating liver partition and portal vein ligation for staged hepatectomy; TACE, transarterial chemoembolization; PSM, propensity score matching; PVTT, portal vein tumor thrombus; TBIL, total bilirubin; AFP, alpha-fetoprotein; ALT, alanine aminotransferase; AST, aspartate aminotransferase.

**Table S4** Comparisons of baseline characteristics of BCLC stage B and C HBV-related HCC patients receiving ALPPS and TACE before and after PSM

| Characteristics            | Before PSM (original cohort) |                         |         | After PSM (matched cohort) |                         |         |
|----------------------------|------------------------------|-------------------------|---------|----------------------------|-------------------------|---------|
|                            | ALPPS (n=12)                 | TACE (n=74)             | P value | ALPPS (n=10)               | TACE (n=10)             | P value |
| Age (y)                    | 38 [32–55]                   | 50 [19–74]              | 0.002   | 38.5 [32–55]               | 43.5 [19–60]            | 0.364   |
| PVTT                       |                              |                         |         |                            |                         |         |
| Yes                        | 5                            | 55                      | 0.022   | 4                          | 4                       | 1       |
| No                         | 7                            | 19                      |         | 6                          | 6                       |         |
| Tumor number               |                              |                         |         |                            |                         |         |
| 1                          | 4                            | 18                      | 0.494   | 3                          | 5                       | 0.650   |
| >1                         | 8                            | 56                      |         | 7                          | 5                       |         |
| Largest tumor (cm)         | 7.25 (2.3–16.6)              | 8.6 (5.5–16.8)          | 0.440   | 6.05 (2.3–16.6)            | 8.95 (5.6–12.3)         | 0.406   |
| Ascites                    |                              |                         |         |                            |                         |         |
| Yes                        | 3                            | 14                      | 0.698   | 2                          | 5                       | 0.350   |
| No                         | 9                            | 60                      |         | 8                          | 5                       |         |
| TBIL ( $\mu\text{mol/L}$ ) | 12.6 (8.0–23.6)              | 14.85 (4.1–35.0)        | 0.270   | 12.55 (9.2–23.6)           | 19.9 (6.5–30.9)         | 0.165   |
| AFP ( $\mu\text{g/L}$ )    | 1,933.5 (10.8–139,031.3)     | 830.0 (2.0–1,277,746.0) | 0.404   | 1,933.5 (10.8–17,069.0)    | 13,745.0 (20–999,999.0) | 0.096   |
| ALT (U/L)                  | 38.5 (9.0–63.0)              | 28.5 (9.0–109.0)        | 0.609   | 38.5 (9.0–63.0)            | 47.5 (26.0–109.0)       | 0.307   |
| AST (U/L)                  | 37.5 (17.0–320.0)            | 25.0 (4.0–218.0)        | 0.032   | 37.5 (17.0–172.0)          | 56.0 (10.0–218.0)       | 0.345   |

BCLC, Barcelona Clinic Liver Cancer; HBV, hepatitis B virus; HCC, hepatocellular carcinoma; ALPPS, associating liver partition and portal vein ligation for staged hepatectomy; TACE, transarterial chemoembolization; PVTT, portal vein tumor thrombus; TBIL, total bilirubin; AFP, alpha-fetoprotein; ALT, alanine aminotransferase; AST, aspartate aminotransferase.

**Table S5** Preoperative patient characteristics and clinical outcomes

| Patient | Age (y) | Gender | Etiology | Cancer diagnosis | Stage-2 ALPPS | Number of lesions | Largest tumor (cm) | PVTT | LNМ | MVI | Ascites | ALBI grading | BCLC staging | Recurrence site                      | Months to recurrence | Months to death |
|---------|---------|--------|----------|------------------|---------------|-------------------|--------------------|------|-----|-----|---------|--------------|--------------|--------------------------------------|----------------------|-----------------|
| 1       | 37      | M      | HBV      | HCC              | Yes           | 1                 | 13.0               | Yes  | Yes | No  | Yes     | 1            | C            | Liver, lung                          | 1                    | 6               |
| 2       | 49      | F      | HBV      | HCC              | Yes           | Multiple          | 3.0                | No   | No  | Yes | No      | 2            | B            | Liver                                | 6                    | 19              |
| 3       | 37      | M      | HBV      | HCC              | Yes           | Multiple          | 5.7                | No   | No  | No  | No      | 1            | B            | Lung                                 | 6                    | 8               |
| 4       | 59      | M      | HBV      | HCC              | Yes           | 1                 | 15.8               | No   | No  | Yes | No      | 2            | A            | Lung                                 | 53                   | 54              |
| 5       | 55      | M      | HBV      | HCC              | Yes           | 1                 | 16.6               | Yes  | No  | No  | No      | 1            | C            | Lung, right atrium                   | 6                    | 26              |
| 6       | 38      | M      | HBV      | HCC              | Yes           | Multiple          | 8.2                | No   | No  | No  | No      | 1            | B            | Lung, enterocoelia                   | 3                    | 7               |
| 7       | 33      | M      | HBV      | HCC              | Yes           | 1                 | 10.3               | No   | No  | No  | No      | 2            | A            | Liver                                | 60                   | Alive           |
| 8       | 51      | M      | HBV      | HCC              | Yes           | 1                 | 20.0               | No   | No  | No  | No      | 2            | A            | Liver, lung                          | 2                    | 19              |
| 9       | 38      | M      | HBV      | HCC              | Yes           | Multiple          | 6.3                | Yes  | No  | Yes | Yes     | 1            | C            | –                                    | –                    | 5               |
| 10      | 66      | M      | HBV      | HCC              | Yes           | Multiple          | 9.3                | No   | Yes | No  | No      | 2            | C            | Liver, Retroperitoneum               | 1                    | 2               |
| 11      | 37      | M      | HBV      | HCC              | Yes           | 1                 | 13.0               | Yes  | No  | Yes | Yes     | 2            | C            | Liver, enterocoelia, retroperitoneum | 1                    | 4               |
| 12      | 32      | M      | HBV      | HCC              | Yes           | Multiple          | 9.9                | Yes  | Yes | No  | No      | 1            | C            | Retroperitoneum                      | 1                    | 8               |
| 13      | 40      | M      | HBV      | HCC              | Yes           | Multiple          | 2.3                | Yes  | No  | No  | No      | 1            | C            | Lung                                 | 4                    | 24              |
| 14      | 51      | M      | HBV      | HCC              | No            | Multiple          | 13.7               | No   | No  | No  | No      | 2            | B            | –                                    | –                    | 3               |
| 15      | 32      | M      | HBV      | HCC              | Yes           | 1                 | 10.9               | No   | No  | Yes | No      | 1            | A            | Lung                                 | 12                   | 25              |
| 16      | 44      | M      | HBV      | HCC              | Yes           | 1                 | 14.7               | No   | No  | No  | No      | 1            | A            | –                                    | –                    | 2               |
| 17      | 39      | M      | HBV      | HCC              | Yes           | Multiple          | 5.8                | No   | Yes | Yes | No      | 1            | C            | Liver, thorax                        | 2                    | 7               |
| 18      | 36      | M      | HBV      | HCC              | No            | Multiple          | 26                 | No   | No  | No  | No      | 2            | B            | –                                    | –                    | Alive           |
| 19      | 38      | M      | HBV      | HCC              | Yes           | 1                 | 13.5               | No   | Yes | No  | No      | 1            | C            | Liver, lung                          | 5                    | Alive           |
| 20      | 41      | M      | HBV      | HCC              | Yes           | Multiple          | 5.5                | No   | No  | No  | No      | 1            | B            | No recurrence                        | Na                   | Alive           |
| 21      | 51      | M      | HBV      | HCC              | Yes           | 1                 | 8.3                | No   | No  | No  | No      | 1            | A            | No recurrence                        | Na                   | Alive           |
| 22      | 48      | M      | HBV      | HCC              | No            | 1                 | 5.1                | Yes  | No  | No  | No      | 2            | C            | No recurrence                        | Na                   | Alive           |
| 23      | 50      | M      | HBV      | HCC              | Yes           | 1                 | 9.2                | No   | No  | No  | No      | 2            | A            | No recurrence                        | Na                   | Alive           |

Missing data occurred because family members of patients refused to answer. ALPPS, associating liver partition and portal vein ligation for staged hepatectomy; PVTT, portal vein tumor thrombus; MVI, microvascular invasion; LNM, lymph node metastasis; ALBI, albumin-bilirubin; BCLC, Barcelona Clinic Liver Cancer; M, male; F, female; HBV, hepatitis B virus; HCC, hepatocellular carcinoma.
